# Supplementary material for: Thiobarbiturate-Derived Compound MHY1025 Alleviates Renal Fibrosis by Modulating Oxidative Stress, Epithelial Inflammation, and Fibroblast Activation
Source: MDPI journal article supplement (doi:10.3390/antiox12111947), 2023-10-31
Supplement: s1 [file s1]

**Supplementary Table 1. Information of Antibodies used in Western blotting**

| Antibody                       | Company    | Catalog number |
|--------------------------------|------------|----------------|
| $\alpha$ -SMA                  | Santa Cruz | sc 32251       |
| NF- $\kappa$ B (p65)           | Santa Cruz | sc 514451      |
| Phospho-NF- $\kappa$ B (p-p65) | Santa Cruz | sc 13548       |
| CD3                            | Santa Cruz | sc 20047       |
| CD68                           | Santa Cruz | sc 20060       |
| COL1A2                         | Santa Cruz | sc 393573      |
| $\alpha$ -Tubulin              | Santa Cruz | sc 5286        |
| Gapdh                          | Santa Cruz | sc 365062      |
| Lamin A/C                      | Santa Cruz | sc 376248      |

**Supplementary Table 2. Primer sequences for qPCR****Mouse**

| <i>Gene</i>   | <i>Forward (5'-3')</i>       | <i>Reverse (3'-5')</i>       |
|---------------|------------------------------|------------------------------|
| <i>Colla2</i> | <i>CAGCTCCAGGAAGACCTCGA</i>  | <i>GTAACAAGGGTGAGCCTGGC</i>  |
| <i>Col3a1</i> | <i>GGTGGCTGCATCCCAATTCA</i>  | <i>GGCAGGGACAACCTGATGGTG</i> |
| <i>Vim</i>    | <i>CAAGCCTGACCTCACTGCTG</i>  | <i>CACCTGTCTCCGGTACTCGT</i>  |
| <i>Tgfb1</i>  | <i>CCTCACCTCCATGTACCAGAA</i> | <i>TGGAAATGACCTTGTCATGAG</i> |
| <i>Fn</i>     | <i>CAACAACCGGAATTACACCG</i>  | <i>GTCTCGGAGCTGGGAGTAGG</i>  |
| <i>Acta2</i>  | <i>TTGCTGACAGGATGCAGAAG</i>  | <i>TGATCCACATCTGCTGGAAG</i>  |
| <i>Ccl2</i>   | <i>CCAGCAAGATGATCCCAATG</i>  | <i>CTTCTTGGGGTCAGCACAGA</i>  |
| <i>Ccl5</i>   | <i>CCCTCACCATCATCCTCACT</i>  | <i>CCTTCGAGTGACAAACACGA</i>  |
| <i>Ccl7</i>   | <i>TGAAAACCCCAACTCCAAAG</i>  | <i>CATTCTTAGGCGTGACCAT</i>   |
| <i>Cxcl1</i>  | <i>AATGCATCCACATGCTGCTA</i>  | <i>ATAGCCTCCTCGACCCACTT</i>  |
| <i>Emr1</i>   | <i>TCTGGGGAGCTTACGATGGA</i>  | <i>GAATCCCGCAATGATGGCAC</i>  |
| <i>Cd68</i>   | <i>GGGGCTCTTGGGAACCTACAC</i> | <i>GTACCGTCACAACCTCCCTG</i>  |
| <i>Gapdh</i>  | <i>AAGGTCATCCCAGAGCTGAA</i>  | <i>CTGCTTCACCACCTTCTTGA</i>  |

**Rat**

| <i>Gene</i>  | <i>Forward (5'-3')</i>      | <i>Reverse (3'-5')</i>      |
|--------------|-----------------------------|-----------------------------|
| <i>Ccl2</i>  | <i>GCCAACTCTCACTG AGCCA</i> | <i>GCATCTGGCTGAGACAGCAC</i> |
| <i>Cxcl1</i> | <i>GCTGGGATTACCTCAAGAA</i>  | <i>TGGGGACACCTTTTAGCATC</i> |

|               |                              |                              |
|---------------|------------------------------|------------------------------|
| <i>Il8</i>    | <i>GAAGATAGATTGCACCGA</i>    | <i>CATAGCCTCTCACACATTTC</i>  |
| <i>Tgfb</i>   | <i>ATACGCCTGAGTGGCTGTCT</i>  | <i>TGGGACTGATCCCATTGATT</i>  |
| <i>Acta2</i>  | <i>ACTGGGACGACATGGAAAAG</i>  | <i>CATCTCCAGAGTCCAGCACA</i>  |
| <i>Col1a2</i> | <i>TCAAGGTTTCCAAGGACCTG</i>  | <i>TTTCCAGGGTGACCATCTTC</i>  |
| <i>Col3a1</i> | <i>AGCTGGACCAAAAGGTGATG</i>  | <i>TCCAGTTAGCCCTGCAATTC</i>  |
| <i>Fn</i>     | <i>GCTGTGCCTTCATTGTTTCAG</i> | <i>CCATTCATGAGAAGCAGCAG</i>  |
| <i>Vim</i>    | <i>TGCACGATGAAGAGATCCAG</i>  | <i>TGGCAGCCACACTTTCATAC</i>  |
| <i>l8s</i>    | <i>AGTCGGCATCGTTTATGGTC</i>  | <i>CGCGGTTCTATTTTGTTGGT</i>  |
| <i>Gapdh</i>  | <i>ACAGCTGCTGCTTTCACCGT</i>  | <i>TCAACCCACTTCTGATGGGCT</i> |
